# Supplementary material
Source: Springer Nature journal article supplement (https://www.springermedizin.de/resource/supplementary/13063_2009_342_MOESM1_ESM.pdf/9618024)
Supplement: MOESM1 [file 9618024]

Patient recruitment

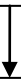

Screening of Patients by Eligibility Criteria  
(N=238)

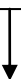

1-week Run-in Period

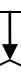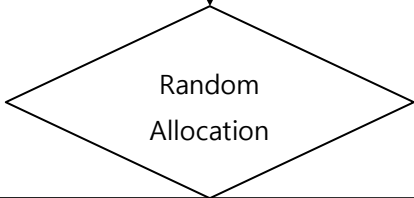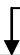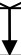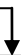

Group A (N=95)  
Active Acupuncture  
Treatment Group

Group B (N=95)  
Sham Acupuncture  
Treatment Group

Group C (N=48)  
No Acupuncture  
Treatment (Waitlist Group)

3 Times/Week for 4 Weeks of Visits

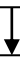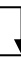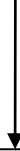

Outcome Assessment at the End of 4<sup>th</sup> Week

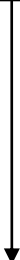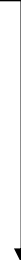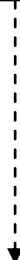

Active Acupuncture  
Treatment  
3 times/week for 4 Weeks

Outcome Assessment  
in 8-week follow up visit
